# TITLE

## Altered expression of a unique set of genes reveals complex etiology of Schizophrenia

**Running title:** Altered gene expressions reveal etiology of Schizophrenia

**Ashutosh Kumar<sup>\*1,9,10</sup>, Himanshu Narayan Singh<sup>2,7,10</sup>, Vikas Pareek<sup>4,10</sup>, Khursheed Raza<sup>1,10</sup>, Pavan Kumar<sup>1,10</sup>, Muneeb A. Faiq<sup>5,6,10</sup>, Sankat Mochan<sup>1,10</sup>, Subrahamanyam Dantham<sup>2,8,10</sup>, Ashish Datt Upadhyaya<sup>3,10</sup>**

- 1- Department of Anatomy, All India Institute of Medical Sciences (AIIMS). New Delhi-110029, India.
- 2- Department of Biochemistry, All India Institute of Medical Sciences (AIIMS). New Delhi-110029, India.
- 3- Department of Biostatistics, All India Institute of Medical Sciences (AIIMS). New Delhi-110029, India.
- 4- Computational Neuroscience and Neuroimaging Division, National Brain Research Centre (NBRC), Manesar, Haryana-122001, India.
- 5- Dr. Rajendra Prasad Centre for Ophthalmic Sciences, All India Institute of Medical Sciences (AIIMS), New Delhi-110029, India.
- 6- Laboratory for Molecular Reproduction and Genetics, Department of Anatomy, All India Institute of medical Sciences (AIIMS), New Delhi-110029, India.
- 7- Functional Genomics Unit, Institute of Genomics and Integrated Biology (IGIB), New Delhi-110025, India.
- 8- National Institute of Malaria Research (NIMR), Indian Council of Medical Research (ICMR), New Delhi-110077, India
- 9- Jawaharlal Institute of Postgraduate Medical Education and Research (JIPMER), Karaikal (Puducherry)-609602, India
- 10- Etiologically Elusive Disorders Research Network (EEDRN), New Delhi, India

**\*Correspondence:** Ashutosh Kumar

aiims.ashu@gmail.com

## Abstract

**Purpose:** The etiology of schizophrenia is extensively debated, and multiple factors have been contended to be involved. A panoramic view of the contributing factors in a genome-wide study can be an effective strategy to provide a comprehensive understanding of its causality.

**Materials and Methods:** GSE53987 dataset downloaded from GEO-database, which comprised mRNA expression data of post-mortem brain tissue across three regions from control and age-matched subjects of schizophrenia (N= Hippocampus (HIP): C-15, T-18, Prefrontal cortex (PFC): C-15, T-19, Associative striatum (STR): C-18, T-18). Bio-conductor -affy- package used to compute mRNA expression, and further t-test applied to investigate differential gene expression. The analysis of the derived genes performed using PANTHER Classification System and NCBI database.

**Results:** A set of 40 genes showed significantly altered ( $p < 0.01$ ) expression across all three brain regions. The analyses unraveled genes implicated in biological processes and events, and molecular pathways relating basic neuronal functions.

**Conclusions:** The deviant expression of genes maintaining basic cell machinery explains compromised neuronal processing in SCZ.

**Keywords:** Genome-wide expression study, Genetic signature, Hippocampus, Associative striatum, Prefrontal cortex

**Abbreviations:** Schizophrenia (SCZ), Hippocampus (HIP), Associative striatum (STR), Prefrontal cortex (PFC)

## Introduction

The etiology of Schizophrenia (SCZ) is extensively debated [1,2]. An uncertainty of the etiology has greatly impeded the treatment of the disease, and neither of the therapeutic approaches [1] is proving much helpful in halting its progression.

Many candidate genes have been reported [3] but none of them actually got validated in population-based studies for persistent association [4,5]. A disease signature derived from genome-wide expression patterns in affected brain regions was highly desirable that would not only help to reach to accurate diagnosis of the disease but also in developing optimal therapeutic approaches aimed at maximum relief of the patients.

### **SCZ pathology may be reflected in expression analysis of neural genes**

SCZ has been noted to cause significant architectural changes in many brain regions, the hippocampal, prefrontal cortex, and basal nuclei regions have been chief among them [6-8].

The architectural changes in the brain varied from the changes in the total size and volume of specific brain regions [9,10] to neural connection between different brain regions [11-13], pruning of dendritic spines [14] and synapses [15,16], synaptic dysfunction [17], and also functional changes as oscillatory coupling [18] and neuronal firing patterns [19]. Each SCZ brain may have a few or more of such architectural defects. The recent study by Sekar et al (2016) in mice models reported a variant allelic form of complement C4A (which is involved into the pruning of synapses) may cause excessive synaptic pruning in developing neural circuits and may put the individuals at risk of developing SCZ [15].

How the neural architectural changes are instructed by the changes in the neural genes has also been shown by some recent studies. Piskorowski et al (2016) have shown in the mouse model that deletion of 22q11 locus may involve the genes making synaptic proteins and that may produce SCZ like symptoms [20]. Fromer and colleagues (2016) have identified over 100 of genetic loci harbouring SCZ associated variants which together involve scores of genes supporting polygenic etiology of SCZ, and also altering the expression or knock down of some of such genes in animal or human stem cell models has shown to compromise neural functions effectively [21].

### **Genetic basis of SCZ: much is now known but connecting mechanism is missing**

SCZ gives a life time risk of ~1 % and shows high heritability (~ 69-81%) [22-24]. The SCZ heritability is derived from CNVs, SNPs, de novo mutations, and structural modifications at

gene promoter regions without involving gene sequences as have been revealed in the genome-wide studies [25-28]. Plenty of CNVs and SNP variants have been reported until [29] yet but none of these appear to be present as a constant association, and also none of them ensures a causal association or contributing alone significantly to the genetic liability for the disease. Emerging evidence suggest the genetic etiology of SCZ may be deriving from accumulative effect of all such gene structure changes [21,30] which plausibly act through influencing expression of neuronal genes by altering gene promoter regions [21,31]. These factors together may implicate thousands of the genes, an indication for the polygenic etiology of the SCZ [21,30,32,33].

Expression derangement of the genes also evidenced to arise of the gene- environment interactions during foetal development and in the lifetime of the individuals [25,34,35] involving the mechanisms as de novo mutations, and epigenetic modifications at the gene promoter sites [27,33,36].

The biological contribution to the disease etiology is ascertained from the adoption studies which showed that offspring of the diseased mothers, although adopted by normal families, bear high risk for developing the disease [37]. Conversely, an essential environmental contribution to the disease etiology is indicated by the findings in the twin-based studies that the siblings of the monozygotic twins, who although share almost same genome, but differ in heritability for SCZ [38]. A gene-environmental interaction necessary for the disease etiology was further indicated by the observation in the adoption studies that siblings of the mothers with schizophrenia showed more prevalence of the disease in harsher rearing conditions in adopter families in comparison to the controls whose original parents had no disease [37].

Prenatal and perinatal environments have been also evidenced to influence initiation of the disease in the adult [39]. Prenatal maternal infections and psychological stress, and also obstetric conditions have been found to put permanent influence on the foetal brain and are considered risk factors for schizophrenia [40-42]. Evidence supports the view that insults to the developing brain get hardwired which creates susceptibility for developing SCZ in adulthood if faced with stressful life conditions [43-45].

Furthermore, even the maternal depression or severe stress in perinatal and/or in childhood period have been found to raise chances of SCZ in the offspring during adulthood [46,47].

The ‘two-hit’ hypothesis for etiogenesis of SCZ [43,45,48] has got wide acceptance among scholars and now a ‘multiple hit’ hypothesis is being suggested by some authors [49]. Literature evidence suggest that CNVs and SNPs, specific mutations and also

intergenerational epigenetic influences create a primarily genetically susceptible brain which if gets further hit by adverse environmental conditions during adulthood, may be leading to SCZ [50-53]. Similarly, a significant environmental insult during development may also prime the brain for developing SCZ with further environmental hits [44].

The challenging environmental conditions during pre and perinatal period [39,54,55], childhood rearing up, and adolescence which found associated with increased risk of SCZ, all may be involved in SCZ etiology by influencing the expression of neuronal genes [31].

Social environmental conditions during adulthood like unemployment, urban living, geographical migration, and prolonged war have been also reported to be associated with increased chances of getting SCZ [56,57]. The mediating mechanism for social environment induced SCZ seems to be chronic psychological stress acting on the neural genes mediated by different complex biological methods as intergenic interactions (epistasis), epigenetic reprogramming, or microRNA [58-59] or splicing quantitative trait loci (sQTLs) mediated regulations [60]. The psychological stress conditions as early life bereavement, social defeats may also be a precondition for SCZ [46,61,62].

Whatever be the organizing mechanism, the resultant up and down regulation of the neuronal genes may be the chief etiological mechanism in SCZ [31]. Plausibly, the dysregulation of the neuronal genes, especially which are involved in maintaining basic cell architecture and machinery, may compromise the information processing in neurons in affected brain regions which manifests as disorganized and deficient behaviour evident in SCZ [63,64].

### **Ontological analysis of altered neural genes may reflect SCZ etiology**

Based on the mounting body of evidence we discussed above, we hypothesized that the altered expression of neuronal genes may be the connecting link between all genetic and environmental factors involved in the etiology of SCZ; hence an ontological analysis of the genes showing altered expression in various brain regions may unravel the components of the complex etiology of SCZ.

## **Materials & Methods**

### **Data Resources**

The mRNA expression data were retrieved from the GEO (Genome Expression Omnibus, GSE53987) (<http://www.ncbi.nlm.nih.gov/geo/>), a public repository for high-throughput microarray. The RNA was originally isolated from post-mortem brain tissue across three

specific regions (Hippocampus (HIP), Prefrontal cortex (PFC): Brodmann Area 46, and Associative striatum (STR)) of control {N=18 (HIP), 19 (PFC), 18(STR)} and age-matched subjects with schizophrenia {N=15 (HIP), 15 (PFC), 18 (STR)}. Equal numbers of male and female (except for odd number samples) diagnosed SCZ cases and controls of adult age (range 22-68 years). The controls were matched for the age and sex with cases, and were free of any neurological or psychiatric illness during their life course. Randomized sampling of the cases and controls were applied to keep away the selection biases.

### **Data retrieval and analysis**

The RNA was isolated from HIP, PFC (Brodmann Area 46), and associative STR and hybridized to U133\_Plus2 Affymetrix chips for m-RNA expression study. Expression analysis of mRNA was done by using “affy” package (<http://www.bioconductor.org/packages/release/bioc/html/affy.html>), which was deposited at Bioconductor and developed in R statistical software program and scripting language. It used three steps to calculate the expression intensities: (i) background correction; (ii) normalization (data were normalized by RMA, subjected to pair wise comparison followed by Benjamini and Hochberg False Discovery rate correction (FDR)), and (iii) expression calculation. After calculation of mRNA expression intensity a simple unpaired two tailed t-test (significance set at  $p \leq 0.01$ ) was applied to the data to filter out the set of genes expressed significantly in all three brain regions.

To categorize the derived significantly altered genes on the basis of their involvement in molecular functions, molecular pathways, and biological events, PANTHER (Protein ANalysis THrough Evolutionary Relationships) Classification System (<http://www.pantherdb.org/>) and NCBI gene database (<http://www.ncbi.nlm.nih.gov/gene/>) were exploited.

### **Results**

A set of 40 genes (Protein coding-38; RNA-gene-2) was identified showing statistically significant ( $p \leq 0.01$ ) altered mRNA expression in schizophrenic patients in the all three brain regions studied (Table 1). Interestingly, it was observed that most of the genes were down-regulated in all three brain regions (32/40). Also, the same genes in all three brain regions have shown the similar direction of expression changes.

These genes were classified into six categories on the basis of their molecular functions (Fig. 1). Further; the genes were classified into fourteen categories on the basis of

involvement in biological processes and events (Table 2). However, some genes belong to more than one category.

Furthermore, in pathway linkage analysis, the gene set was found to link with 36 molecular pathways (Fig. 2) that broadly could be placed in seven categories based on their commonality (Table 3).

## **Discussion**

The structural and functional brain abnormalities have been repeatedly reported in patients with SCZ [65]. The brain regions chosen for this study are noted to be predominantly affected in SCZ [6-8]. Hence, the study of genome expression status in these brain regions was expected to unravel mysterious disease etiology which may be conclusive in deciding suitable therapeutic strategies to the disease. Also, as none of the genes revealed in this study had been reported earlier as the candidate gene, the new set appeals for fresh attention for the etiology of SCZ..

### **Involvement of the gene set in molecular functions**

The functional analysis of the gene-set (Fig. 1) elucidated the genes being involved in the regulation of basic machinery and housekeeping functions of the neurons viz. receptor-ligand binding [66], catalysis [67], enzymatic regulation [68], nucleic acid binding transcription factor activity [69], structural molecule activity [70] and transport activities [71]. It is well evident that dysregulation of all these basic functions of neurons will certainly manifest in compromised neuronal physiology and hence information processing which has been a hallmark of the progressed SCZ [72]. The molecular function analysis also showed the hierarchy of the functions compromised in SCZ (Fig. 1) (the catalysis and receptor-ligand binding being most affected functions), and that knowledge can be exploited in prioritizing therapeutic targets.

### **Involvement of the gene set in biological processes and events**

The comprehensive influence of the dysregulation of these genes in pathogenesis of SCZ gets further clarified in the analysis for the involvement in the biological processes and cellular events (Table 2). The implication of genes involved in ubiquitination (Table 2a), enzyme activity (Table 2b) and energy production mechanisms (Table 2c) may point towards a generalized failure of the basic functions in neurons; as ubiquitination is known to regulate

the diverse spectrum of cellular functions [73] and same should be true for the genes encoding enzymes, especially those necessary for mitochondrial functions (ATP5D, PDK4) [74], regulating specific signalling pathways (MAPK9) [68] and involved in phosphorylation (ATP5D, PDK4) or dephosphorylation (PPM1E) [75,76]. The dysregulation of genes involved in energy production (Table 2c) also confirms prevailed view in the literature that energy production mechanisms get compromised in SCZ [77-79].

Again, down-regulation of genes which function as regulator of the cell growth mechanisms (Table 2d) explains reduced neuronal cell sizes, synaptic connection and brain volume in specific brain regions noted in schizophrenia [10,80], and significant upregulation of genes involved in the programmed death (Table 2e) may indicate pro-apoptotic mechanisms prevailing in particular brain regions in schizophrenia, and this inference also gets supported by some earlier studies [81-83] but that may not be a generalised feature in SCZ, as we also noted an evidence contrary to the claim also that an anti-apoptotic gene MCL-1 [84] was found significantly upregulated in all three brain regions, but there is literature evidence that although MCL-1 is an anti-apoptotic gene, it regulates cell cycle negatively hence limiting the mitosis [85].

Also, the significantly altered expression of the genes involved in cytoplasmic vesicular transport and exocytosis (Table 2f), dynamic regulation of actin and tubulin cytoskeleton (Table 2g), and ion channel homeostasis (Table 2h) [86], lipid-binding (PITPNA) and synthesis (CADPS) (Table 2i) may hint of compromised neuronal information processing in SCZ.

### **Involvement of the gene set in molecular pathways**

In pathway linkage analysis (Fig. 2, Table 3), the category involving largest number of molecular pathways has been that of neurotransmitters /modulators and neurohormones (Table 3a) which fits with clinical manifestations of the disease and also gets support from existing theories that the etiology of SCZ majorly may be based on dysregulation of this category of molecules [87,88].

Various neurotransmitters based hypotheses have been proposed for the etiology of SCZ [88-92] but none of them are primarily explaining causality of the diseases. The result of this study (Fig. 3, Table 3) indicates that disease etiology is not implicating any single transmitter but many of them together, warranting for an integrative study aimed at an unifying mechanism for involvement of more than one neurotransmitter and or modulators at a time [93]. The misexpression of the genes for neurotransmitters and modulators may have the



greatest impact on the synaptic transmission [94,95] and oscillation coupling of the neural wave bands [96-98] hence consequently may compromise neural communications severely.

The linkage of the immune cell/chemokine mediated pathways (Table 3b) is strongly supported by literature [99-101]. An immunogenic basis of SCZ etiology had also been brought forward [11,102] although counter to this hypothesis has also been placed which limits the role of immune function related genes as a solo or major factor in SCZ etiology [103]. Also, the involvement of growth, differentiation and survival of neurons in the specific brain regions (Table 3c) [104,105] (also discussed in subsection ‘Involvement of the gene set in biological processes and events’) and pathways related to apoptosis (Table 3d) [81,82,106] (also discussed in subsection ‘Involvement of the gene set in biological processes and events’), and related to protein synthesis (Table 3e) and degradation (Table 3f) [107,108] has been well documented in the literature (also discussed in subsection ‘Involvement of the gene set in biological processes and events’). The linkage of FGF signalling pathway (Table 3c) under neuronal growth, differentiation and survival to SCZ etiology has been corroborated by a freshly published study by Narla et al (2017) who regarded it as a central pathway commanding all other pathways in developing brain strengthening the view that SCZ has a neurodevelopmental etiology [109].

The linking of the pathways involved in the pathogenesis of major neurodegenerative diseases (Table 3g) such as Alzheimer [110,111], Parkinson [112], and Huntington’s disease [113,114] indicates neurodegenerative nature of SCZ and may help in understanding the disease pathogenesis as well as developing new drug targets.

### **Non-protein-coding genes: Unknown functions**

The neuronal functions associated with 2 non-coding genes (LOC100507534, LOC100507534) couldn’t be ascertained from the literature but it’s interesting to find the significant alteration of these long non-coding RNAs in SCZ which has never been reported before. There are now strong indications that non-coding genes are implicated in SCZ pathology [115,116].

### **SCZ may have a neurodevelopmental and neurodegenerative component together**

This had been a long time puzzle [117] that schizophrenia is a pure neurodevelopmental [83,109] disease or neurodegenerative disorder [118,119]. Although, support for neurodevelopmental etiology is getting upper hand with fresh research (also discussed in

subsection ‘Involvement of the gene set in molecular pathways ‘) [109], evidence has been presented in favour of both [120]. Our study hints for a mixed etiology with involvement of molecular pathways related to brain development and neurogenesis (Table 3c) and neurodegeneration (Table 3g). A mixed etiology has been advocated by some other authors also [119,121].

## **Further insights**

### **Massive protein derangement**

The set revealed in this study mostly contained protein-coding genes (38 out of 40), and their significantly altered expression provides a clue for massive derangement of the proteome in schizophrenia which has been also suggested by a proteome-based study [122]. A recent study has indicted abnormal metabolism of some proneural proteins involved in formation of synapses as a probable etiological factor in SCZ [123].

### **Evidence for associated male infertility in schizophrenia**

Two of the altered genes, SOX9 and SPAG7 (Table 1), are known to regulate selective germ cell development, and spermatogenesis which may be an explanation for the associated infertility in male SCZ patients [124,125]. Also, the implication of gonadotrophin releasing hormone (GNRH) pathway (Table 3a) with the gene set provides a reason for the associated infertility in SCZ [126]. The noted linking of the schizophrenia with sex-selective genes, and also to the fertility regulating pathway are unique findings, to our knowledge never noticed before. Although abnormal response to exogenous GNRH administration is known in acute SCZ, however, an elevated secretion of prolactin which is a GNRH suppressor has also been noted in SCZ which may be a usual side effect of many anti-psychotic drugs [127].

### **Genetic basis of schizophrenia: indications from this study**

Our study confirms the view that SCZ etiology is polygenic and multifactorial [33], and also identifies the probable contributory factors (Fig. 1, Table 2). Although, this study has implicated the genes representing many ontological categories as we discussed above, neither of the category has been large enough to contain more than few genes, which suggests a multifactorial etiology of SCZ where all factors will add some effects rather than being a solo actor. Further, how the change in genomic architecture is translated in to the behavioural

features of SCZ can be explained by the altered expression of the genes related to specific neuronal functions (further elaborated in subsection 'Detuning of the normal neuronal gene expression may be etiomechanism of SCZ'). Role of epigenetics in etiology of SCZ [36,128,129] gets a small hint in our study also (histone acetyltransferase gene KAT5, NCBI Gene ID: 10524, Table 2l).

### **Detuning of the normal neuronal gene expression may be etiomechanism of SCZ**

Massive gene expression changes in three important regions of the brain which regulate different cognitive and stereotype functions [6-8] indicate that SCZ may be arising from interactions of all such individual genetic changes hence consequent accumulated effect on neural functions of the affected brain regions. As we discussed above, the ontological analysis of the gene set in our study provides the basis for comprehensive loss of neural functions in SCZ. An altered neural functionary of these brain regions which are nodal points for the neural network involved in neurocognitive functions plausibly may manifest in SCZ like symptoms. It seems that normalized expressions of these genes are necessary for optimum neural functioning and detuning of their expressions is reflected in characteristic disorganization of the behavior marked by the disease. Further, how detuning of the expression of neuronal genes lead to change of behavior may implicate the dysregulation of the usually ongoing synaptic and other neuroplastic changes in the brain. If we elaborate this theory further, it also hints that schizophrenia pathology can be reverted to the unmeasured extent with plausible normalization of the altered expression of the genes with rehabilitative or therapeutic approaches.

### **Conclusions**

The gene set revealed in this study provides a better representation of the brain pathology developing in schizophrenia as it included major brain regions affected in the disease hence can be used as a genetic signature for diagnosing and monitoring the disease progression as well as therapeutic effects of the drugs, and also benefits of rehabilitative practices.

The misexpression of spermatogenesis related genes is indicating a possible reason behind predominant male infertility in SCZ.

## **Limitations of this study**

Although the study implied a robust design to keep away the biases by randomized sampling of the test and control, a more personalised study taking more care of possible confounding factors as age, sex, progression of disease and drug intake history of each sample etc., which will also require a much larger sample size, and also the validation of the analysed data with more than one gene expression analysis techniques and methods may further augment the value of this research. Also, the limitations with the post-mortem brain samples for the gene expression analysis should be kept in mind while making inference from the findings and interpretations of this study.

## **Further research**

The genes which were significantly altered in only one or two and not in all three brain regions selected for study have not been included in analysis and they might carry some value in disease etiology hence should be studied individually. Moreover, the gene expression changes in many other brain regions which are known to be implicated in SCZ, needs to be investigated. A neural circuit specific analysis of the changes in gene expressions targeted to the individual neurocognitive domains may further augment the etiological clarity on SCZ. The mis-expression of spermatogenesis related genes noted in our study is a unique finding needs to be further investigated.

## **Conflict of Interest**

None

## **Acknowledgement**

We are thankful to Thomas A Lanz, contributor of the GSE53987 dataset at Gene Expression Omnibus, NCBI.

## References

1. **Rubeša G, Gudelj L, Kubinska N** Etiology of schizophrenia and therapeutic options. *Psychiatria Danubina* 2011; **23**: 308–315.
2. **Tandon R, Keshavan MS, Nasrallah HA** Schizophrenia, “Just the Facts” What we know in 2008. 2. *Epidemiology and etiology. Schizophrenia Research*. 2008; **102**: 1–18.
3. **Gogos JA, Gerber DJ** Schizophrenia susceptibility genes: emergence of positional candidates and future directions. *Trends in Pharmacological Sciences* 2006; **27**: 226–233.
4. **Crow TJ** The emperors of the schizophrenia polygene have no clothes. *Psychological Medicine* 2008; **38** :1681–1685.
5. **Farrell M, et al.** Evaluating historical candidate genes for schizophrenia. *Molecular psychiatry* 2015; **20**: 555–562.
6. **Kegeles LS et al.** Increased synaptic dopamine function in associative regions of the striatum in schizophrenia. *Archives of general psychiatry* 2010; **67**: 231–239.
7. **Manoach DS** Prefrontal cortex dysfunction during working memory performance in schizophrenia: reconciling discrepant findings. *Schizophrenia research* 2003; **60**: 285–298.
8. **Tamminga CA, Stan AD, Wagner AD** The hippocampal formation in schizophrenia. *The American Journal of Psychiatry* 2010; **167**: 1178–1193.
9. **Haijma SV, et al.** Brain Volumes in Schizophrenia: A Meta-Analysis in Over 18 000 Subjects. *Schizophrenia Bulletin* 2012:sbs118.
10. **Ward KE, Friedman L, Wise A, Schulz SC** Meta-analysis of brain and cranial size in schizophrenia. *Schizophrenia Research* 1996; **22**: 197–213.
11. **Arnedo J, et al.** Decomposition of brain diffusion imaging data uncovers latent schizophrenias with distinct patterns of white matter anisotropy. *NeuroImage* 2015; **120**: 43–54.
12. **Harrison PJ** The neuropathology of schizophrenia. A critical review of the data and their interpretation. *Brain: A Journal of Neurology* 1999; **122**: 593–624.
13. **Stephan KE, Baldeweg T, Friston KJ** Synaptic plasticity and dysconnection in schizophrenia. *Biological Psychiatry* 2006; **59**: 929–939.
14. **Glausier JR, Lewis DA** Dendritic Spine Pathology in Schizophrenia. *Neuroscience* 2013; **251**: 90–107.
15. **Sekar A, et al.** Schizophrenia risk from complex variation of complement component 4. *Nature* 2016; **530**: 177–183.

16. **Whalley K** Psychiatric disorders: Linking genetic risk to pruning. *Nature Reviews Neuroscience* 2016; **17**: 199–199.
17. **Yin D-M, et al.** Synaptic dysfunction in schizophrenia. *Advances in Experimental Medicine and Biology* 2012; **970**: 493–516.
18. **Uhlhaas PJ, Singer W** High-frequency oscillations and the neurobiology of schizophrenia. *Dialogues in Clinical Neuroscience*. 2013;15(3):301–313.
19. **Krabbe S, et al.** Increased dopamine D2 receptor activity in the striatum alters the firing pattern of dopamine neurons in the ventral tegmental area. *Proceedings of the National Academy of Sciences* 2015; **112**: E1498–E1506
20. **Piskorowski RA, et al.** Age-Dependent Specific Changes in Area CA2 of the Hippocampus and Social Memory Deficit in a Mouse Model of the 22q11.2 Deletion Syndrome. *Neuron* 2016; **89**: 163–176.
21. **Fromer M, et al.** Gene expression elucidates functional impact of polygenic risk for schizophrenia. *Nature Neuroscience* 2016; **19**: 1442–1453.
22. **Lichtenstein P, et al.** Common genetic determinants of schizophrenia and bipolar disorder in Swedish families: a population-based study. *The Lancet* 2009; **373**: 234–239.
23. **Sullivan PF, Kendler KS, Neale MC** Schizophrenia as a complex trait: evidence from a meta-analysis of twin studies. *Archives of General Psychiatry* 2003; **60**: 1187–1192.
24. **Wray NR, Gottesman II** Using summary data from the danish national registers to estimate heritabilities for schizophrenia, bipolar disorder, and major depressive disorder. *Frontiers in Genetics* 2012; **3**: 118.
25. **Akbarian S** Epigenetics of schizophrenia. *Current Topics in Behavioral Neurosciences* 2010; **4**: 611–628.
26. **Gejman P, Sanders A, Duan J** The Role of Genetics in the Etiology of Schizophrenia. *The Psychiatric clinics of North America* 2010; **33**: 35–66.
27. **Kavanagh DH, et al.** Schizophrenia genetics: emerging themes for a complex disorder. *Molecular Psychiatry* 2015; **20**: 72–76.
28. **Rees E, O'Donovan MC, Owen MJ** Genetics of schizophrenia. *Current Opinion in Behavioral Sciences* 2015; **2**:8–14.
29. **Gejman P, Sanders A, Duan J** The Role of Genetics in the Etiology of Schizophrenia. *The Psychiatric clinics of North America* 2010; **33**: 35–66.
30. **Freedman R, et al.** Evidence for the multigenic inheritance of schizophrenia. *American journal of medical genetics* 2001; **105**: 794–800.

31. **Bray NJ** Gene Expression in the Etiology of Schizophrenia. *Schizophrenia Bulletin* 2008; **34**: 412–418.
32. **Gottesman II, Shields J** A polygenic theory of schizophrenia. *Proceedings of the National Academy of Sciences of the United States of America* 1967; **58**: 199–205.
33. **Purcell SM, et al.** A polygenic burden of rare disruptive mutations in schizophrenia. *Nature* 2014; **506**: 185–190.
34. **Caspi A, Moffitt TE** Gene–environment interactions in psychiatry: joining forces with neuroscience. *Nature Reviews Neuroscience* 2006; **7**: 583–590.
35. **Champagne FA** Early environments, glucocorticoid receptors, and behavioral epigenetics. *Behavioral Neuroscience* 2013; **127**: 628–636.
36. **Akbarian S** Epigenetics of schizophrenia. *Current topics in behavioral neurosciences*. 2010; **4**: 611–628.
37. **Ingraham LJ, Kety SS** Adoption studies of schizophrenia. *American Journal of Medical Genetics*. 2000; **97**: 18–22.
38. **Dempster EL, et al.** Disease-associated epigenetic changes in monozygotic twins discordant for schizophrenia and bipolar disorder. *Human Molecular Genetics* 2011; **20**: 4786–4796.
39. **Meli G, Öttl B, Paladini A, Cataldi L** Prenatal and perinatal risk factors of schizophrenia. *The Journal of Maternal-Fetal & Neonatal Medicine* 2012; **25**: 2559–2563.
40. **Børglum AD, et al.** Genome-wide study of association and interaction with maternal cytomegalovirus infection suggests new schizophrenia loci. *Molecular Psychiatry* 2014; **19**: 325–333.
41. **Malaspina D, et al.** Acute maternal stress in pregnancy and schizophrenia in offspring: A cohort prospective study. *BMC Psychiatry* 2008; **8**: 71.
42. **Mittal VA, Ellman LM, Cannon TD** Gene-environment interaction and covariation in schizophrenia: the role of obstetric complications. *Schizophrenia Bulletin* 2008; **34**: 1083–1094.
43. **Feigenson KA, Kusnecov AW, Silverstein SM** Inflammation and the Two-Hit Hypothesis of Schizophrenia. *Neuroscience and biobehavioral reviews* 2014; **38**: 72–93.
44. **Giovanoli S, et al.** Stress in Puberty Unmasks Latent Neuropathological Consequences of Prenatal Immune Activation in Mice. *Science*. 2013; **339**: 1095–1099.
45. **Mednick SA et al.** A two-hit working model of the etiology of schizophrenia. Origins and development of schizophrenia: *Advances in experimental psychopathology*. Washington, DC, US: American Psychological Association 1998: 27–66.



46. **Khashan AS, et al.** Higher Risk of Offspring Schizophrenia Following Antenatal Maternal Exposure to Severe Adverse Life Events. *Archives of General Psychiatry* 2008; **65**: 146–152.
47. **Mäki P, et al.** Schizophrenia in the offspring of antenatally depressed mothers in the northern Finland 1966 birth cohort: relationship to family history of psychosis. *The American Journal of Psychiatry* 2010; **167**: 70–77.
48. **Giovanoli S, et al.** Stress in puberty unmasks latent neuropathological consequences of prenatal immune activation in mice. *Science (New York, N.Y.)* 2013; **339**: 1095–1099.
49. **Davis J, et al.** A review of vulnerability and risks for schizophrenia: Beyond the two hit hypothesis. *Neuroscience and biobehavioral reviews* 2016; **65**: 185–194.
50. **Giusti-Rodríguez P, Sullivan PF** The genomics of schizophrenia: update and implications. *The Journal of Clinical Investigation* 2013; **123**: 4557–4563.
51. **Helbig I** The heritability of schizophrenia, as told by common SNPs. *Beyond the Ion Channel*. 2014. Retrieved from <http://channelopathist.net/2012/07/30/the-heritability-of-schizophrenia-as-told-by-common-snps/>
52. **Rutten BPF, Mill J** Epigenetic Mediation of Environmental Influences in Major Psychotic Disorders. *Schizophrenia Bulletin* 2009; **35**: 1045–1056.
53. **Xu B, et al.** Exome sequencing supports a de novo mutational paradigm for schizophrenia. *Nature Genetics* 2011; **43**: 864–868.
54. **Bandelow B, et al.** Early traumatic life events, parental rearing styles, family history of mental disorders, and birth risk factors in patients with social anxiety disorder. *European archives of psychiatry and clinical neuroscience* 2004; **254**: 397–405.
55. **Feinberg I** Schizophrenia: caused by a fault in programmed synaptic elimination during adolescence? *Journal of psychiatric research* 1983; **17**: 319–334.
56. **Dean K, Murray RM** Environmental risk factors for psychosis. *Dialogues in Clinical Neuroscience* 2005; **7**: 69–80.
57. **Yaktin US, Labban S** Traumatic war. Stress & schizophrenia. *Journal of Psychosocial Nursing and Mental Health Services* 1992; **30**: 29–33.
58. **Brami-Cherrier K, et al.** Epigenetic Reprogramming of Cortical Neurons through Alteration of Dopaminergic Circuits. *Molecular psychiatry* 2014; **19**: 1193–1200.
59. **Caputo V, Ciolfi A, Macri S, Pizzuti A** The emerging role of MicroRNA in schizophrenia. *CNS & neurological disorders drug targets* 2015; **14**: 208–221.
60. **Takata A, Matsumoto N, Kato T** Genome-wide identification of splicing QTLs in the human brain and their enrichment among schizophrenia-associated loci. *Nature Communications* 2017; **8**: 14519.



61. **Selten J-P, Cantor-Graae E** Social defeat: risk factor for schizophrenia? *The British Journal of Psychiatry* 2005; 187: 101–102.
62. **Selten J-P, et al.** The Social Defeat Hypothesis of Schizophrenia: An Update. *Schizophrenia Bulletin*. 2013; 39: 1180–1186.
63. **Hemby SE, et al.** Gene Expression Profile for Schizophrenia: Discrete Neuron Transcription Patterns in the Entorhinal Cortex. *Archives of General Psychiatry* 2002; 59: 631–640.
64. **Maycox PR, et al.** Analysis of gene expression in two large schizophrenia cohorts identifies multiple changes associated with nerve terminal function. *Molecular Psychiatry* 2009; 14: 1083–1094.
65. **Antonova E, et al.** The relationship between brain structure and neurocognition in schizophrenia: a selective review. *Schizophrenia research* 2004; **70**: 117–145.
66. **Muguruza C, et al.** Dysregulated 5-HT 2A receptor binding in postmortem frontal cortex of schizophrenic subjects. *European Neuropsychopharmacology* 2013; **23**: 852–864.
67. **Mabrouk H, et al.** Butyrylcholinesterase activity in schizophrenic patients. *Annales de biologie Clinique* 2010; **69**: 647–652.
68. **Enriquez-Barreto L, Morales M** The PI3K signaling pathway as a pharmacological target in Autism related disorders and Schizophrenia. *Molecular and cellular therapies* 2016; **4**: 1.
69. **Boyajyan A, Atshemyan S, Zakharyan R** Association of schizophrenia with variants of genes that encode transcription factors. *Molecular Biology* 2015; **49**: 875–880.
70. **Föcking M, et al.** Proteomic and genomic evidence implicates the postsynaptic density in schizophrenia. *Molecular psychiatry* 2015; **20**: 424–432.
71. **Wiesel F-A, et al.** Aberrant tyrosine transport across the cell membrane in schizophrenia. *European Psychiatry* 2002; **17**: 75.
72. **Giersch A, et al.** Disruption of information processing in schizophrenia: The time perspective. *Schizophrenia Research: Cognition* 2015; **2**: 78–83.
73. **Hershko A, Ciechanover A** The ubiquitin system. *Annual Review of Biochemistry* 1998; **67**: 425–479.
74. **Bubber P, et al.** Mitochondrial enzymes in schizophrenia. *Journal of Molecular Neuroscience* 2004; 24: 315–321.
75. **Emamian ES, Karayiorgou M, Gogos JA** Decreased phosphorylation of NMDA receptor type 1 at serine 897 in brains of patients with Schizophrenia. *The Journal of neuroscience* 2004; 24: 1561–1564.

76. **Vaughan RA** Phosphorylation and regulation of psychostimulant-sensitive neurotransmitter transporters. *Journal of Pharmacology and Experimental Therapeutics* 2004; **310**: 1–7.
77. **Prabakaran S, et al.** Mitochondrial dysfunction in schizophrenia: evidence for compromised brain metabolism and oxidative stress. *Molecular Psychiatry* 2004; **9**: 684–697.
78. **Robicsek O, et al.** Abnormal neuronal differentiation and mitochondrial dysfunction in hair follicle-derived induced pluripotent stem cells of schizophrenia patients. *Molecular Psychiatry* 2013; **18**: 1067–1076.
79. **Verge B, et al.** Mitochondrial DNA (mtDNA) and schizophrenia. *European Psychiatry* 2011; **26**: 45–56.
80. **Rais M, et al.** Brain volume reductions in medication-naïve patients with schizophrenia in relation to intelligence quotient. *Psychological Medicine* 2012; **42**: 1847–1856.
81. **Jarskog LF, et al.** Apoptotic mechanisms in the pathophysiology of schizophrenia. *Progress in Neuro-Psychopharmacology & Biological Psychiatry* 2005; **29**: 846–858.
82. **Jarskog LF, et al.** Apoptotic proteins in the temporal cortex in schizophrenia: high Bax/Bcl-2 ratio without caspase-3 activation. *American Journal of Psychiatry* 2004; **161**: 109–115.
83. **Rapoport JL, et al.** The neurodevelopmental model of schizophrenia: update 2005. *Molecular psychiatry* 2005; **10**: 434–449.
84. **Perciavalle RM, et al.** Anti-apoptotic MCL-1 localizes to the mitochondrial matrix and couples mitochondrial fusion to respiration. *Nature cell biology* 2012; **14**: 575–583.
85. **Fujise K, et al.** Regulation of apoptosis and cell cycle progression by MCL1 differential role of proliferating cell nuclear antigen. *Journal of Biological Chemistry* 2000; **275**: 39458–39465.
86. **Lidow MS** Calcium signaling dysfunction in schizophrenia: a unifying approach. *Brain Research Reviews* 2003; **43**: 70–84.
87. **Gill KM, Grace AA** The Role of Neurotransmitters in Schizophrenia. In: Schulz SC, Green MF, Nelson KJ, eds. *Schizophrenia and Psychotic Spectrum Disorders*, Oxford University Press, 2016: 153–184.
88. **Matthysse S, Sugarman J** Neurotransmitter Theories of Schizophrenia. In: Iversen LL, Iversen SD, Snyder SH, eds. *Handbook of Psychopharmacology*. Springer US, 1978: 221–242.
89. **Iqbal N, et al.** Serotonin and Schizophrenia. *Psychiatric Annals* 1993; **23**: 186–192.

90. **Jentsch JD, Roth RH** The Neuropsychopharmacology of Phencyclidine: From NMDA Receptor Hypofunction to the Dopamine Hypothesis of Schizophrenia. *Neuropsychopharmacology* 1999; **20**: 201–225.
91. **Toda M, Abi-Dargham A** Dopamine hypothesis of schizophrenia: making sense of it all. *Current Psychiatry Reports* 2007; **9**: 329–336.
92. **Wassef A, Baker J, Kochan LD** GABA and schizophrenia: a review of basic science and clinical studies. *Journal of Clinical Psychopharmacology* 2003; **23**: 601–640.
93. **Bencherif M, et al.** Alpha7 nicotinic cholinergic neuromodulation may reconcile multiple neurotransmitter hypotheses of schizophrenia. *Medical Hypotheses* 2012; **78**: 594–600.
94. **Frankle WG, Lerma J, Laruelle M** The Synaptic Hypothesis of Schizophrenia. *Neuron* 2003; **39**: 205–216.
95. **Mirnics K, et al.** Analysis of complex brain disorders with gene expression microarrays: schizophrenia as a disease of the synapse. *Trends in Neurosciences* 2001; **24**: 479–486.
96. **Carlén M, et al.** A critical role for NMDA receptors in parvalbumin interneurons for gamma rhythm induction and behavior. *Molecular Psychiatry* 2012; **17**: 537–548.
97. **McNally JM, McCarley RW, Brown RE** Impaired GABAergic neurotransmission in schizophrenia underlies impairments in cortical gamma band oscillations. *Current Psychiatry Reports* 2013; **15**: 346.
98. **Uhlhaas PJ, Singer W** Abnormal neural oscillations and synchrony in schizophrenia. *Nature Reviews Neuroscience* 2010; **11**: 100–113.
99. **Jones AL, et al.** Immune dysregulation and self-reactivity in schizophrenia: Do some cases of schizophrenia have an autoimmune basis? *Immunology and Cell Biology*. 2005; **83**: 9–17.
100. **Müller N, Schwarz MJ** Immune System and Schizophrenia. *Current Immunology Reviews*. 2010; **6**: 213–220.
101. **Reale M, et al.** Dysregulation of chemo-cytokine production in schizophrenic patients versus healthy controls. *BMC Neuroscience* 2011; **12**: 13.
102. **Malavia TA, et al.** Generating testable hypotheses for schizophrenia and rheumatoid arthritis pathogenesis by integrating epidemiological, genomic, and protein interaction data. *npj Schizophrenia*. 2017; **3**: 11.
103. **Pouget JG, et al.** Genome-Wide Association Studies Suggest Limited Immune Gene Enrichment in Schizophrenia Compared to 5 Autoimmune Diseases. *Schizophrenia Bulletin* 2016; **42**: 1176–1184.

104. **Lee AS, et al.** The Neuropsychiatric Disease-Associated Gene *cacna1c* Mediates Survival of Young Hippocampal Neurons. *eNeuro* 2016; **3**: ENEURO.0006-16.2016.
105. **Maschietto M, et al.** Co-expression network of neural-differentiation genes shows specific pattern in schizophrenia. *BMC Medical Genomics* 2015; **8**: 23.
106. **Lin M, et al.** Integrative transcriptome network analysis of iPSC-derived neurons from schizophrenia and schizoaffective disorder patients with 22q11.2 deletion. *BMC Systems Biology* 2016; **10**: 105.
107. **English JA, et al.** Reduced protein synthesis in schizophrenia patient-derived olfactory cells. *Translational Psychiatry* 2015; **5**: e663.
108. **Rubio MD, et al.** Dysfunction of the ubiquitin proteasome and ubiquitin-like systems in schizophrenia. *Neuropsychopharmacology: Official Publication of the American College of Neuropsychopharmacology* 2013; **38**: 1910–1920.
109. **Narla ST, et al.** Common developmental genome deprogramming in schizophrenia - Role of Integrative Nuclear FGFR1 Signaling (INFS). *Schizophrenia Research* 2017. <https://doi.org/10.1016/j.schres.2016.12.012>
110. **Aoki T, Mizuki Y, Terashima T** Relation between schizophrenia and Alzheimer's disease: the reelin signaling pathway. *Psychogeriatrics* 2005; **5**: 42–47.
111. **Horesh Y, et al.** Gene expression signature is shared by patients with Alzheimer's disease and schizophrenia at the superior temporal gyrus: Shared expression signature for schizophrenia and Alzheimer's. *European Journal of Neurology* 2011; **18**: 410–424.
112. **Nalls MA, et al.** Genetic comorbidities in Parkinson's disease. *Human Molecular Genetics* 2014; **23**: 831–841.
113. **Boxall R, Porteous DJ, Thomson PA** DISC1 and Huntington's Disease – Overlapping Pathways of Vulnerability to Neurological Disorder? *PlosOne* 2011; **6**: e16263.
114. **Tsuang D, et al.** Familial aggregation of schizophrenia-like symptoms in Huntington's disease. *American Journal of Medical Genetics* 1998; **81**: 323–327.
115. **Roussos P, et al.** A role for non-coding variation in schizophrenia. *Cell reports* 2014; **9**: 1417–1429.
116. **Xiao X, Chang H, Li M** Molecular mechanisms underlying noncoding risk variations in psychiatric genetic studies. *Molecular Psychiatry* 2017. <https://doi.org/10.1038/mp.2016.241>
117. **Malaspina D** Schizophrenia: a neurodevelopmental or a neurodegenerative disorder. *The Journal of clinical psychiatry* 2006; **67**: e07.
118. **Christopoulos I, et al.** A neurodegenerative perspective on schizophrenia. *Annals of General Psychiatry* 2006; **5**(Suppl 1): S261.

119. **Lieberman JA** Is schizophrenia a neurodegenerative disorder? a clinical and neurobiological perspective. *Biological Psychiatry* 1999; **46**: 729–739.
120. **Pino O, et al.** Neurodevelopment or neurodegeneration: review of theories of schizophrenia. *Actas Espanolas De Psiquiatria* 2014; **42**: 185–195.
121. **Ashe PC, Berry MD, Boulton AA** Schizophrenia, a neurodegenerative disorder with neurodevelopmental antecedents. *Progress in Neuro-Psychopharmacology & Biological Psychiatry* 2001; **25**: 691–707.
122. **Palmowski P, et al.** Acute Phencyclidine Treatment Induces Extensive and Distinct Protein Phosphorylation in Rat Frontal Cortex. *Journal of Proteome Research* 2014; **13**: 1578–1592.
123. **D’Rozario M, et al.** Type I bHLH Proteins Daughterless and Tcf4 Restrict Neurite Branching and Synapse Formation by Repressing Neurexin in Postmitotic Neurons. *Cell Reports* 2016; **15**: 386–397.
124. **Bundy H, Stahl D, MacCabe JH** A systematic review and meta-analysis of the fertility of patients with schizophrenia and their unaffected relatives. *Acta Psychiatrica Scandinavica* 2011; **123**: 98–106.
125. **Haukka J, Suvisaari J, Lönnqvist J** Fertility of patients with schizophrenia, their siblings, and the general population: a cohort study from 1950 to 1959 in Finland. *The American Journal of Psychiatry* 2003; **160**: 460–463.
126. **Cantalamesa L, et al.** Gonadotropin releasing hormone elicits abnormal hormone responses in schizophrenia. *Psychoneuroendocrinology* 1985; **10**: 481–484.
127. **Halbreich U, et al.** Elevated prolactin levels in patients with schizophrenia: mechanisms and related adverse effects. *Psychoneuroendocrinology* 2003; **28 Suppl 1**: 53–67.
128. **Deng Z, Sobell JL, Knowles JA** Epigenetic Alterations in Schizophrenia. *FOCUS: The Journal of Lifelong Learning in Psychiatry* 2010; **8**: 358–365.
129. **Lee S-A, Huang K-C** Epigenetic profiling of human brain differential DNA methylation networks in schizophrenia. *BMC Medical Genomics* 2016; **9**: 68.

**Table1. Genome wide m-RNA expression (statistical significance set at  $p \leq 0.01$ ) in three brain regions of schizophrenic patients and healthy controls (data represented as mean).**

|                       | Hippocampus |        |         | Prefrontal Cortex |        |         | Associative striatum |        |         |
|-----------------------|-------------|--------|---------|-------------------|--------|---------|----------------------|--------|---------|
| Gene Symbol           | Control     | SCZ    | p-value | Control           | SCZ    | p-value | Control              | SCZ    | p-value |
|                       | (n=15)      | (n=18) |         | (n=15)            | (n=19) |         | (n=18)               | (n=18) |         |
| MSANTD3               | 8.33        | 8.03   | 0.001   | 8.71              | 8.50   | 0.003   | 8.15                 | 8.03   | 0.006   |
| CXADR                 | 5.52        | 5.00   | 0.001   | 5.46              | 5.10   | 0.003   | 5.83                 | 5.44   | 0.004   |
| ZNF385B               | 6.27        | 5.47   | 0.000   | 8.30              | 8.06   | 0.005   | 8.44                 | 7.61   | 0.008   |
| SAFB2                 | 7.12        | 7.46   | 0.005   | 6.88              | 7.13   | 0.002   | 7.49                 | 7.74   | 0.006   |
| FBXO9<br>1559094_at   | 9.49        | 8.71   | 0.000   | 10.19             | 9.70   | 0.002   | 8.78                 | 8.28   | 0.002   |
| FBXO9<br>1559096_x_at | 10.68       | 10.07  | <0.001  | 11.25             | 10.92  | 0.004   | 10.27                | 9.95   | 0.003   |
| MCL1                  | 9.74        | 10.23  | 0.002   | 9.76              | 10.10  | 0.002   | 9.83                 | 10.25  | 0.002   |
| PITPNA                | 10.74       | 10.39  | 0.000   | 11.18             | 11.04  | 0.006   | 10.31                | 10.16  | 0.008   |
| PSMC3                 | 9.64        | 9.17   | <0.001  | 9.92              | 9.72   | 0.008   | 10.15                | 9.80   | 0.008   |
| IFITM2                | 9.77        | 10.46  | 0.001   | 9.29              | 9.83   | 0.003   | 10.04                | 10.47  | 0.008   |
| ICMT                  | 8.09        | 7.93   | 0.008   | 8.22              | 8.00   | 0.001   | 8.83                 | 8.43   | 0.000   |
| UQCRC1                | 10.70       | 10.29  | <0.001  | 11.06             | 10.92  | 0.003   | 10.69                | 10.46  | 0.008   |
| ASNA1                 | 9.30        | 8.99   | 0.000   | 9.42              | 9.29   | 0.006   | 9.19                 | 8.99   | 0.008   |
| TIAL1                 | 7.97        | 7.70   | 0.000   | 7.94              | 7.79   | 0.003   | 7.89                 | 7.67   | 0.003   |
| GTF2H1                | 7.59        | 7.02   | 0.000   | 8.04              | 7.77   | 0.002   | 7.38                 | 6.96   | 0.003   |
| ANPEP                 | 9.22        | 10.26  | <0.001  | 8.81              | 9.61   | 0.004   | 9.36                 | 10.11  | 0.005   |
| SOX9                  | 9.39        | 9.70   | 0.008   | 9.07              | 9.55   | 0.001   | 9.41                 | 9.70   | 0.002   |
| CHSY1                 | 8.18        | 8.64   | 0.001   | 8.29              | 8.60   | 0.002   | 8.20                 | 8.49   | 0.007   |
| BCL6                  | 9.78        | 10.48  | 0.000   | 10.18             | 10.48  | 0.002   | 9.52                 | 10.00  | 0.009   |

|                             |       |       |        |       |       |        |       |       |       |
|-----------------------------|-------|-------|--------|-------|-------|--------|-------|-------|-------|
| PDCD6                       | 10.11 | 9.65  | <0.001 | 10.29 | 10.11 | 0.004  | 10.01 | 9.73  | 0.005 |
| ERCC1                       | 9.13  | 8.84  | 0.000  | 9.09  | 8.95  | 0.008  | 8.85  | 8.65  | 0.000 |
| MYO5A                       | 8.70  | 8.30  | 0.003  | 9.24  | 8.90  | 0.004  | 7.69  | 7.35  | 0.002 |
| KCNK1                       | 10.73 | 10.40 | 0.003  | 10.90 | 10.70 | 0.003  | 10.08 | 9.78  | 0.008 |
| GNAO1                       | 10.58 | 10.23 | 0.006  | 10.61 | 10.32 | 0.001  | 10.37 | 10.03 | 0.005 |
| HAPLN1                      | 5.84  | 5.14  | 0.002  | 5.88  | 5.53  | 0.002  | 4.77  | 4.49  | 0.007 |
| PPM1E                       | 9.12  | 8.26  | 0.007  | 7.62  | 7.33  | 0.008  | 6.37  | 6.08  | 0.001 |
| KAT5                        | 8.46  | 8.29  | 0.001  | 8.70  | 8.59  | 0.008  | 8.68  | 8.56  | 0.008 |
| MAPK9                       | 8.13  | 7.50  | <0.001 | 8.74  | 8.40  | 0.001  | 8.03  | 7.63  | 0.003 |
| SPAG7                       | 9.90  | 9.65  | 0.000  | 9.92  | 9.80  | 0.001  | 9.52  | 9.37  | 0.001 |
| ANAPC5                      | 11.02 | 10.84 | <0.001 | 10.95 | 10.81 | 0.001  | 11.02 | 10.80 | 0.009 |
| ATP5D                       | 10.71 | 10.40 | <0.001 | 10.76 | 10.60 | 0.005  | 10.66 | 10.46 | 0.008 |
| UBE4B                       | 7.76  | 7.50  | 0.006  | 8.03  | 7.87  | 0.010  | 7.71  | 7.45  | 0.004 |
| SCRN3                       | 8.12  | 7.65  | 0.001  | 8.18  | 7.98  | 0.008  | 7.64  | 7.27  | 0.002 |
| SMIM7                       | 9.13  | 8.77  | 0.001  | 9.35  | 9.14  | 0.005  | 9.38  | 9.05  | 0.002 |
| PDK4                        | 8.24  | 9.15  | 0.001  | 7.98  | 8.85  | 0.000  | 8.60  | 9.27  | 0.003 |
| RBM18                       | 9.31  | 8.99  | 0.001  | 9.60  | 9.47  | 0.006  | 9.18  | 8.96  | 0.003 |
| SAMD5                       | 6.76  | 6.38  | 0.006  | 6.85  | 6.60  | 0.001  | 7.47  | 6.85  | 0.000 |
| CADPS                       | 6.43  | 6.20  | 0.004  | 6.40  | 6.16  | 0.005  | 6.10  | 5.89  | 0.004 |
| LOC100506538<br>/// NDUFAF6 | 8.13  | 7.57  | 0.001  | 8.50  | 8.28  | 0.004  | 8.11  | 7.69  | 0.008 |
| LOC100507534                | 6.38  | 5.28  | 0.002  | 6.29  | 5.51  | <0.001 | 4.42  | 4.19  | 0.007 |

Table 2. Involvement of the gene set in biological processes and events.

|          |                                                       |                                                                                    |
|----------|-------------------------------------------------------|------------------------------------------------------------------------------------|
| <b>a</b> | <b>Ubiquitination</b>                                 | FBXO9, ANAPC5, UBE4B , SMIM7                                                       |
| <b>b</b> | <b>Enzyme activity</b>                                | PPM1E, MAPK9, ATP5D, ICMT, PDK4, PSMC3                                             |
| <b>c</b> | <b>Energy production mechanisms</b>                   | UQCRC1, ASNA1, ATPD5, PDK4                                                         |
| <b>d</b> | <b>Cell growth</b>                                    | MAPK9, ANAPC5, CHSY1                                                               |
| <b>e</b> | <b>Programmed cell death</b>                          | IFITM2 <sup>a</sup> , TIAL1 <sup>a</sup> , PDCD6 <sup>a</sup> , MCL-1 <sup>b</sup> |
| <b>f</b> | <b>Cytoplasmic vesicular transport and exocytosis</b> | MYO5A,PITPNA, ASNA1,CADPS, SCRNB                                                   |
| <b>g</b> | <b>Dynamic regulation of cytoskeleton</b>             | MYO5A                                                                              |
| <b>h</b> | <b>Ion channel homeostasis</b>                        | KCNK1, PDCD6                                                                       |
| <b>i</b> | <b>Lipid binding and synthesis</b>                    | PITPNA, CAPDS                                                                      |
| <b>j</b> | <b>DNA repair</b>                                     | ERCC1, KAT5                                                                        |
| <b>k</b> | <b>m-RNA transcription</b>                            | MSANTD3,GTF2H1, GNAO1, MAPK9                                                       |
| <b>l</b> | <b>Post transcriptional gene modifications</b>        | KAT5                                                                               |
| <b>m</b> | <b>Protein translation</b>                            | TIAL1                                                                              |
| <b>n</b> | <b>Cell cycle regulation</b>                          | ANAPC5, MAPK9                                                                      |

Reference: NCBI gene database (<http://www.ncbi.nlm.nih.gov/gene/>). a=Pro-apoptotic, b=Anti-apoptotic



**Table 3. Involvement of the gene set in molecular pathways**

| <b>Neurotransmitters/ Immune<br/>modulators/neuro- hormones<br/>(a)</b>    | <b>cell/chemokine mediated<br/>(b)</b>                                          | <b>Growth, differentiation and cell survival<br/>(c)</b> | <b>Apoptosis<br/>(d)</b>                 | <b>Protein synthesis<br/>(e)</b>              | <b>Protein degradation<br/>(f)</b>        | <b>Pathogenesis of neurodegenerative diseases<br/>(g)</b> |
|----------------------------------------------------------------------------|---------------------------------------------------------------------------------|----------------------------------------------------------|------------------------------------------|-----------------------------------------------|-------------------------------------------|-----------------------------------------------------------|
| (i) Metabotropic glutamate receptor group II pathway (P00040)              | (i) B cell activation (P00010)                                                  | (i) EGF receptor signaling pathway (P00018)              | (i) Apoptosis signaling pathway (P00006) | (i) General transcription regulation (P00023) | (i) Ubiquitin proteasome pathway (P00060) | (i) Alzheimer disease-amyloid secretase pathway (P00003)  |
| (ii) GABA-B receptor II signaling (P05731)                                 | (ii) T cell activation (P00053)                                                 | (ii) FGF signaling pathway (P00021)                      |                                          |                                               |                                           | (ii) Alzheimer disease-presenilin pathway (P00004)        |
| (iii) Muscarinic acetylcholine receptor 2 and 4 signaling pathway (P00043) | (iii) Toll receptor signaling pathway (P00054)                                  | (iii) TGF-beta signaling pathway (P00052)                |                                          |                                               |                                           | (iii) Huntington disease (P00029)                         |
| (iv) Nicotinic acetylcholine receptor signaling pathway (P00044)           | (iv) Inflammation mediated by chemokine and cytokine signaling pathway (P00031) | (iv) FAS signaling pathway (P00020)                      |                                          |                                               |                                           | (iv) Parkinson disease (P00049)                           |
| (v) 5HT1 type receptor mediated signaling pathway (P04373)                 | (v) Integrin signalling pathway (P00034)                                        | (v) Heterotrimeric G-protein signaling pathway-Gq        |                                          |                                               |                                           |                                                           |

alpha and Go  
alpha mediated  
pathway  
(P00027)

(vi) Endogenous  
cannabinoid  
signaling  
(P05730)

(vi) Interferon-  
gamma  
signaling  
pathway  
(P00035)

(vi) Oxidative  
stress response  
(P00046)

(vii) Enkephalin  
release (P05913)

(vii) Ras  
Pathway  
(P04393)

(viii) Opioid  
prodynorphin  
pathway (P05916)

(ix) Opioid  
proopiomelanocorti  
n pathway (P05917)

(x) CCKR signaling  
map (P06959)

(xi) Gonadotropin-  
releasing hormone  
receptor pathway  
(P06664)

## Figure Legends:

### Fig. 1. Involvement of the gene set in molecular functions

(Catalysis (n=17, p=44.7%), binding (n=13, p=34.2%), and nucleic acid binding transcription factor activity (n=5, p=13.2%), transporter activity (n=4, p=10.50%), enzyme regulation (n=3, p=7.90%), and structural molecule activity (n=2, p=5.3%), n=number of genes, p=percentage Source: Panther Classification System)

**Cross-references in Text:** Result and Discussion (subsections ‘Involvement of the gene set in molecular functions’ and ‘Genetic basis of schizophrenia: indications from this study’).

### Fig. 2. Involvement of the gene set in molecular pathways

**Cross-references in Text:** Result and Discussion (subsections ‘Involvement of the gene set in molecular pathways’ and ‘SCZ may have a neurodevelopmental and neurodegenerative component together’).

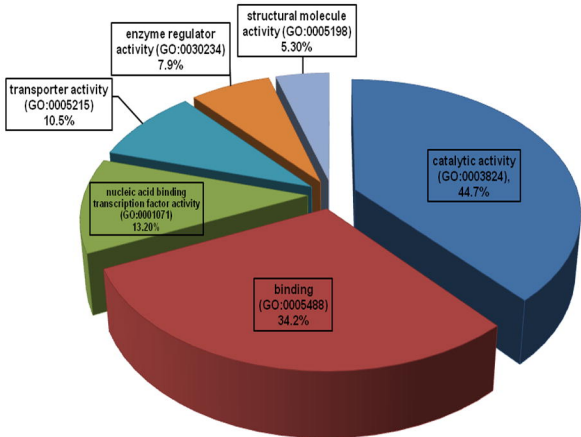

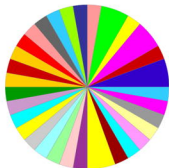

Number of genes: 40  
Total pathway hits: 36  
Source: PANTHER pathway

5HT1 type receptor mediated signaling pathway (P04373)

Alzheimer disease-amyloid secretase pathway (P00003)

Alzheimer disease-presenilin pathway (P00004)

Apoptosis signaling pathway (P00006)

B cell activation (P00010)

CCR5 signaling map (P06950)

EGF receptor signaling pathway (P00016)

Endogenous cannabinoid signaling (P05730)

Enkephalin release (P05915)

FAS signaling pathway (P00020)

FGF signaling pathway (P00021)

GABA-B receptor II signaling (P06731)

General transcription regulation (P00023)

Gonadotropin-releasing hormone receptor pathway (P06664)

Heterotrimeric G-protein signaling pathway-Gq alpha and

Go alpha mediated pathway (P00027)

Huntington disease (P00029)

Inflammation mediated by chemokine and cytokine  
signaling pathway (P00031)

Integrin signalling pathway (P00034)

Interferon-gamma signaling pathway (P00035)

Metabotropic glutamate receptor group II pathway  
(P00040)

Muscarinic acetylcholine receptor 2 and 4 signaling  
pathway (P00043)

Nicotinic acetylcholine receptor signaling pathway  
(P00044)

Opioid prodynorphin pathway (P05916)

Opioid proopiomelanocortin pathway (P05917)

Oxidative stress response (P00046)

Parkinson disease (P00049)

Ras Pathway (P04191)

T cell activation (P00051)

TGF-beta signaling pathway (P00052)

Toll receptor signaling pathway (P00054)

Transcription regulation by bZIP transcription factor  
(P00055)

Ubiquitin proteasome pathway (P00060)
